# Supplementary material for: Contagious degradation of a chemically active surface on the cathodes of lithium-ion batteries
Source: Royal Society of Chemistry journal article supplement (doi:10.1039/c8cp03537g), 2018-01-01
Supplement: c8cp03537g1.pdf [file c8cp03537g1.pdf]

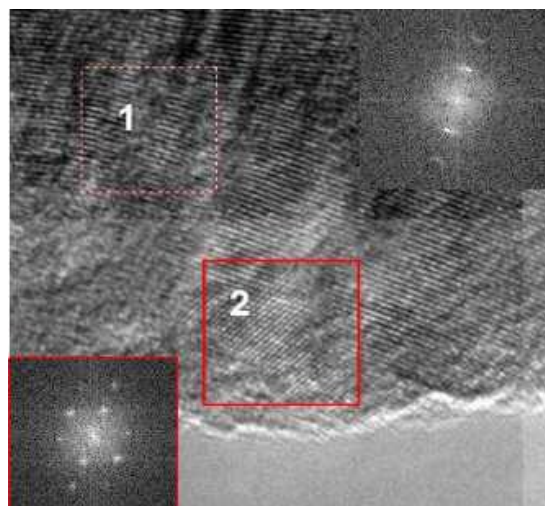

Figure S3 TEM and FFT images of NCM811 after 60°C storage for 30 days with obvious rock-salt phase on the surface of the particles.

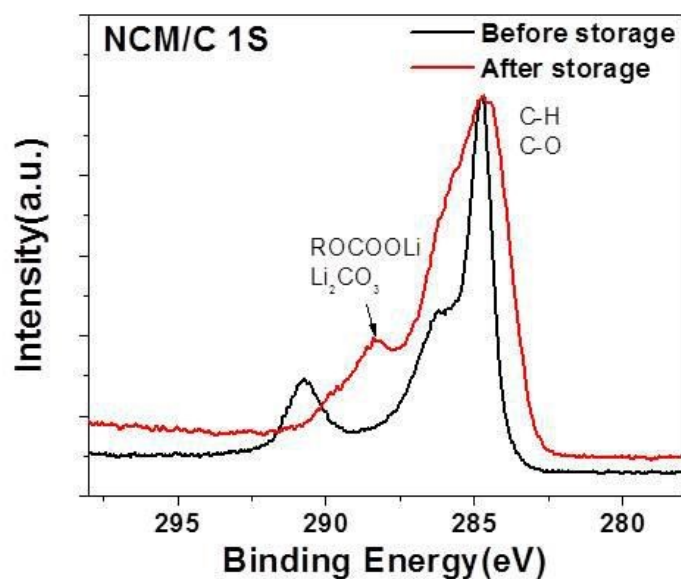

Figure S4 C 1s XPS spectra of the NCM811 before and after 60°C storage for 30 days. The electrolyte oxidation product, inorganic and organic salt are on the surface of the NCM811 particle.

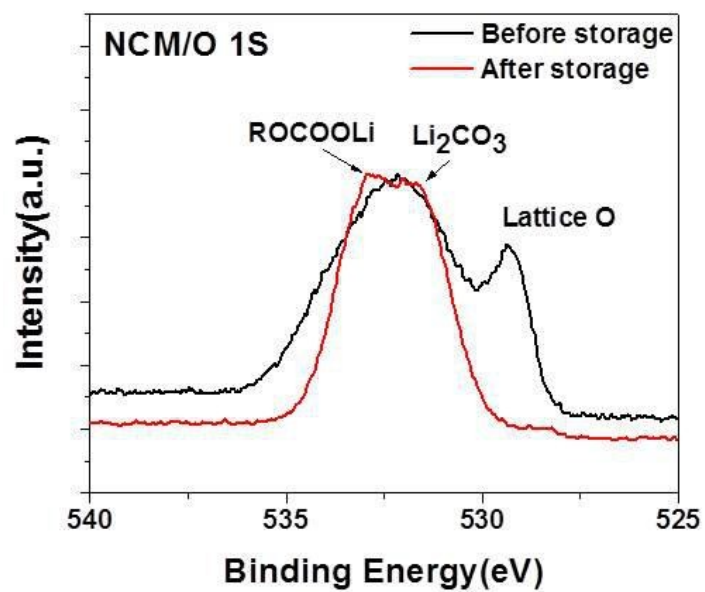

Figure S5 O 1s XPS spectra of the NCM811 before and after 60°C storage for 30 days. The electrolyte oxidation product, inorganic and organic salt are on the surface of the NCM811 particle.
